1 **Climate change and the migration of a pastoralist people c.3500 cal. years**  
2 **BP inferred from palaeofire and lipid biomarker records in the montane**  
3 **Western Ghats, India**

4

5 Sarath Pullyottum Kavil (Centre for Ecological Sciences, Indian Institute of Science, Bengaluru, India.  
6 Email: sarathp39@gmail.com)

7

8 Prabhakaran Ramya Bala (Centre for Earth Sciences, Centre for Ecological Sciences & Divecha Centre  
9 for Climate Change, Indian Institute of Science, Bengaluru, India. Email: pramyabala@gmail.com)

10

11 Pankaj Kumar (Inter-University Accelerator Centre, New Delhi, India. Email:  
12 baghelpankaj@gmail.com)

13

14 Devanita Ghosh (Centre for Earth Sciences, Indian Institute of Science, Bengaluru, India. Email:  
15 devanita@iisc.ac.in)

16

17 Raman Sukumar (Centre for Ecological Sciences and Divecha Centre for Climate Change, Indian  
18 Institute of Science, Bengaluru 560012, India. Email: rsuku@iisc.ac.in) [Corresponding Author]

19

20 **Abstract**

21

22 Human migration in response to climate change during the Holocene has been recorded in  
23 many regions of the world. The Todas are a pastoralist people who are believed to have  
24 colonized the higher elevations (>2000 m asl) of the Nilgiris in the Western Ghats, India, not  
25 earlier than about 2000 cal. yr BP. Vegetation shifts in response to changing climate in tropical  
26 montane forest-grassland mosaic of the Ghats have been well documented using stable carbon  
27 isotopes and pollen profiles; however, there have been no corresponding investigations of  
28 human presence and activity at the highest elevations. We used a number of other proxies to  
29 infer the human ecology of this montane region. Radiocarbon dated (~22,000 cal. BP to the  
30 present) peat samples from the Sandynallah basin (2200m asl, Nilgiri hills, Tamil Nadu State)  
31 were used to reconstruct fire history, animal abundance, and human presence since the Last  
32 Glacial Maximum (LGM). While the macro-charcoal record indicates fires at the LGM, macro-  
33 and micro-charcoal counts indicate intense fire at ~3500 cal. yr BP, coprophilous fungal spores  
34 indicate a large population of herbivorous mammals, and steroid biomarkers indicate human  
35 faecal remains for the first time. This period is also characterized by dry arid conditions and  
36 dominant grassy vegetation as inferred from *n*-alkane signatures. We thus infer that a pastoralist  
37 people, most likely the Todas, migrated to the highest elevations of the Western Ghats along  
38 with their buffalo herds in response to prolonged or abrupt climate change in peninsular India,  
39 about 3500 cal. yr BP or at least 1500 years prior to what historical accounts assume.

40 **Keywords:** Palaeoclimate, Holocene, human migration, Toda, buffalo culture, lipid biomarker

41

## 42 **1. Introduction:**

43

44 Climate change is known to have driven human adaption through migration from the earliest  
45 times of human evolution (Carto et al. 2009; Tierney, deMenocal, and Zander 2017) through  
46 to the historical period of the late Holocene (D'Andrea et al. 2011). Some of the best  
47 documented migrations involving nomadic pastoralists and agriculturalists come from Chinese  
48 chronicles (Fang and Liu 1992; Pei 2017). A series of migrations of nomadic people in the  
49 Mongolian grasslands and east-central Asia between 190 BCE and 1880 CE is closely related  
50 to historical cold and dry periods (Fang and Liu 1992). Holocene migrations in the tropics have  
51 been less well documented, though the migration of the Harappan people southward, following  
52 the decline of the extensive Harappan civilization in northwest India and Pakistan, has been  
53 increasingly attributed to the aridification of this region about four millennia ago (Chandran,  
54 1997; Dixit, Hodell, and Petrie 2014; Dutt et al. 2019).

55

56 Peninsular India has been inhabited by modern humans not long after the out-of-Africa  
57 migration (Korisettar 2016) while, at the same time, it has been subject to a changing climate  
58 in tune with global change during the late Pleistocene and Holocene Epochs (Sukumar et al.  
59 1993; Rajagopalan et al., 1997; Bhagwat, Nogué, and Willis 2012). Human societies in the  
60 peninsula have gone through a complex process of transitions from hunter-gatherer through  
61 pastoralist to settled agricultural over this period (Korisettar et al. 2001; Johansen 2004; Fuller,  
62 Boivin, and Korisettar 2007; Fuller 2013; Morrison et al. in press), though their links to climate  
63 have been scarcely investigated. The Western Ghats (sea level up to >2600m in the Nilgiris  
64 and Anamalais) running parallel to the west coast of India have generally been settled much  
65 after the Deccan plateau and its river valleys, perhaps because the Ghats were largely hilly and  
66 densely forested. Although human occupation of the Ghats has only been attributed to the end  
67 of the Palaeolithic, about 12,000 cal. BP (Chandran 1997), it is certain that human influences  
68 along the fringes of the Ghats, both the moister west and the drier east, would have been much  
69 earlier. In any case, no evidence has so far been presented or even suggested for human  
70 occupation at the highest elevations (>2000m asl) of the Ghats prior to about 2000 cal. BP; the  
71 steep slopes, rugged terrain and dense forests at lower to mid-elevation with a history of malaria  
72 may have proved to be difficult barriers for the ascent of humans to the highest elevations. The  
73 Todas, an obligate buffalo-tending pastoral community, are widely believed to be the earliest

74 people to move into the upper Nilgiri plateau perhaps during the 1st millennium CE or later  
75 (Rivers 1906; Noble 1976; Emeneau 1997; Zagarell 1997). Other indigenous people of the  
76 Nilgiris include the artisan Kotas, and the hunter-gather or cultivator Kurumbas and Irulas who  
77 have inhabited the region since early times, while the cultivator Badagas were 16th century  
78 immigrants (Hockings 1980).

79

80 The higher elevation (>2000m asl) of the Nilgiris features a unique ecosystem mosaic  
81 consisting of patches of tropical montane forests (locally known as *sholas*) restricted to the  
82 folds, valleys and depressions, and extensive grasslands on the slopes, ridges and exposed areas  
83 (Meher-Homji 1967; Jose et al. 1994; Das et al. 2015). Late Pleistocene and Holocene  
84 paleoclimatic reconstruction using stable carbon isotope analysis of peat from high-elevation  
85 (>2000 m asl) valleys of the Nilgiris suggests that the region had undergone phases of wet and  
86 arid climate, broadly in tune with well-known global climatic events since the Last Glacial  
87 Maximum, resulting in shifts in the relative dominance of C3 plants (mainly woody vegetation  
88 and herbs other than tropical grasses) and C4 plants (tropical grasses) (Sukumar et al. 1993;  
89 Caner et al. 2007). Evidence from pollen studies also suggests the co-occurrence of grassland  
90 and forest through moister and more arid phases in the Nilgiri region over this period (Vasanthy  
91 1988; Sutra, Bonnefille, and Fontugne 1997). While these studies have provided us with a fairly  
92 good understanding of past vegetation and associated climate, in particular the strength of the  
93 monsoon, they have not specifically investigated the human ecology associated with these  
94 changes.

95

96 At the same time, several other proxies such as macro- and microcharcoal abundance in  
97 sediments to record fires including those of possible anthropogenic origin (Carcaillet et al.  
98 2001; Whitlock and Larsen 2002; Clark 1988), fungal spores associated with dung to assess  
99 animal abundance (Van Geel 2002), leaf wax lipids characteristic of different plant types, and  
100 steroid compounds indicative of animal- and human faeces (Pancost et al. 2002; Meyers 2003)  
101 are useful to understand the relationship between climate, vegetation and human presence or  
102 activity. In particular, lipid biomarkers which are powerful tools in resolving past plant or  
103 animal origins have been hardly explored in paleoecological research in India. Alkanes have  
104 been used to trace their source in sediments from microbes, algae and higher plant types  
105 (Cranwell 1973; Ficken et al. 2000; Pancost et al. 2002; Nichols et al. 2006). *n*-alkane  
106 distributions dominated by carbon chain lengths C<sub>21</sub>, C<sub>23</sub> and C<sub>25</sub> suggest aquatic plant  
107 dominance (Pancost et al. 2002; Nichols et al. 2006). A predominance of C<sub>27</sub>, C<sub>29</sub> and C<sub>31</sub>

108 indicate higher contribution from epicuticular leaf waxes of land plants, with elevated C<sub>31</sub>  
109 presence attributed to inputs from grasses and C<sub>27</sub> or C<sub>29</sub> predominance related to a tree-leaf  
110 origin (Cranwell 1973; Rommerskirchen et al. 2006). Thus,  $nC_{27}/nC_{31}$  ratio has been applied  
111 to understand the changes in relative distributions of grasses and woody plants in peatland  
112 (Schwark, Zink, and Lechterbeck 2002).

113

114 Faecal steroid (stanols and sterols) biomarkers have been used to identify the biogenic origin  
115 in ancient samples as these organic molecules are resistant to diagenetic alteration and  
116 degradation (Bull et al., 1999; Bull et al., 2002; Prost et al., 2017). Stanols are produced by the  
117 microbial degradation process from their  $\Delta^5$ -sterols precursors (Bull et al. 2002; Nash et al.  
118 2005). Coprostanol is the major  $5\beta$ -stanol in human faeces, while the faeces of herbivores such  
119 as cows and sheep contain a higher relative proportion of  $5\beta$ -stigmastanol due to the high  
120 amount of stigmasterol, campesterol and sitosterol derived from their herbivorous diet  
121 (Linseele et al. 2013; Leeming et al. 1996). The ratios of various steroid compounds in dated  
122 archaeological samples have thus been used in identifying human and herbivorous mammalian  
123 faeces and, hence, their presence at a particular site (Linseele et al. 2013; Prost et al. 2017;  
124 Schroeter et al. 2020). Steroid biomarkers have never been used so far in exploring their origins  
125 in any archaeological or paleoecological context in India.

126

127 We thus carried out this study on Late Quaternary paleoecology of the Nilgiris with the  
128 following primary objectives:

- 129 a. To complement the earlier studies on paleo-climatic and paleo-vegetation by using  
130 proxies other than pollen and stable isotopes.
- 131 b. To use charcoal counts in peat to trace fire history and draw inferences on its possible  
132 relationship to past climate and human activity.
- 133 c. To use fungal spores specific to animal dung to determine the past abundance of  
134 herbivorous animals which may also signify presence of domestic animals.
- 135 d. To use lipid steroid biomarkers (associated with faeces) extracted from peat to detect  
136 the presence of domestic livestock and human populations in the Nilgiri plateau.

137

138

139

140

## 141 2. Methods

### 142 2.1. Study site

143 Our study site, the Sandynallah valley, is located between 11°26'32"N, 76°38'6"E and  
144 11°26'37"N 76°38'8"E at an elevation of ~2200 m above sea level, in the Nilgiri massif of the  
145 southern Western Ghats, India (Fig. 1). Since 1950, the study site is administered by the Sheep  
146 Breeding Research Station (SBRS) of Tamil Nadu University of Veterinary and Animal  
147 Sciences (TANUVAS). Although the site is located in the tropical belt, peat is preserved in  
148 valleys in this mountain range due to cool temperatures (annual average 13.5 °C) and  
149 moderately high precipitation leading to water logging (annual average precipitation of about  
150 1400 mm) (von Lengerke 1977). These tropical mountain ranges feature peat deposits dating  
151 back to >40,000 radiocarbon yr BP which have been studied extensively to reconstruct Late  
152 Quaternary vegetation and climate (Vasanthy 1988; Sukumar et al. 1993; Sutra, Bonnefille,  
153 and Fontugne 1997; Rajagopalan et al., 1997; Ramya Bala 2015; Ramya Bala et al. 2016).

154

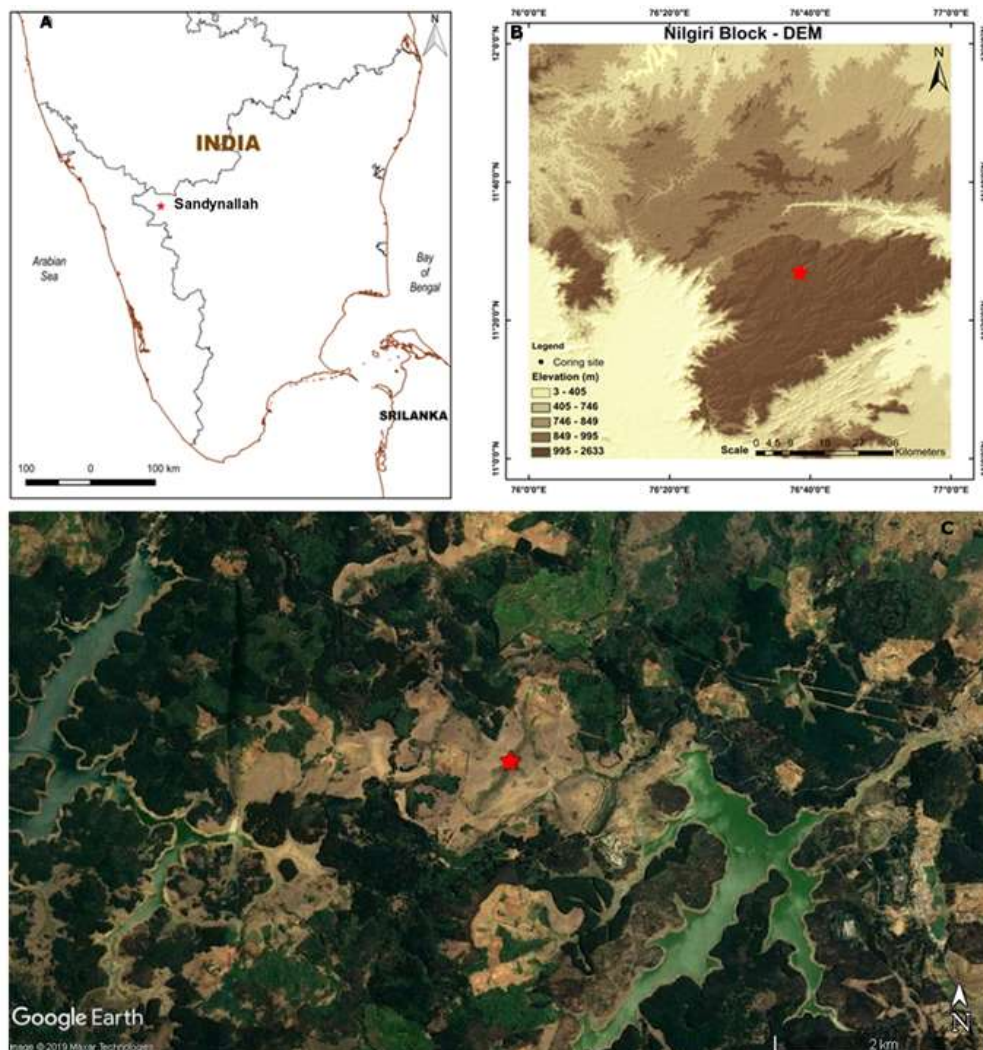

155

156 Fig 1. (A) The physical map of peninsular India depicting the Sandynallah site in the Nilgiris  
157 (B) The digital elevation model (source: ASTER GDEM) of the study region with the altitude  
158 range given in the side panel, (C) Google Earth image of Sandynallah and the trenching site  
159 with a mosaic vegetation pattern.

## 160 2.2. Sample collection and $^{14}\text{C}$ dating

161 A pit of ~1.8 m depth was dug close to a location from which a core (labelled as Core 1) had  
162 been previously taken and radiocarbon dated (Ramya Bala et al. 2016), and peat samples  
163 collected as monoliths at regular intervals in a stainless-steel box of dimensions 15.6 cm x 9.3  
164 cm x 3.0 cm. Thirteen samples were collected in zip lock bags, adjacent samples starting from  
165 the surface separated by ~2 cm, down to a depth of ~1.6 m. Sub-samples were freeze dried  
166 (Labconco bulk drier) and crushed into fine powder and stored. Accelerated Mass Spectrometry  
167 (AMS) radiocarbon dating of seven peat samples after standard Acid Alkali Acid (AAA) pre-  
168 treatment (Nakamura et al., 2003) was carried out at the Inter-University Accelerator Centre  
169 (IUAC), New Delhi (Table 1). Blank sample prepared along with the peat samples was used  
170 for background correction, while standard sample OXII (oxalic acid II) was used for  
171 normalization (Sharma et al., 2019). Data quality was monitored with a secondary standard  
172 (IAEA-C7); the consensus value ( $p\text{MC} = 49.53 \pm 0.12$ ) was within the error limits of the  
173 experimental result ( $p\text{MC} = 49.48 \pm 0.12$ ). Calibration of the radiocarbon dates was done using  
174 OxCal (Ramsey, 2013).

175

176 **Table 1.** Details of the AMS  $^{14}\text{C}$  dated peat samples and calibrated dates using OxCal from the  
177 Sandynallah basin

| Lab Code      | Sample type | Sample ID | Depth range | AMS $^{14}\text{C}$ age $\pm$ Error | Calibrated age range Cal BP ( $2\sigma$ ) | Median cal yr BP |
|---------------|-------------|-----------|-------------|-------------------------------------|-------------------------------------------|------------------|
| IUACD#17C1321 | Bulk Peat   | PS1       | 2-11 cm     | -159 $\pm$ 31                       | 19 to -2                                  | 4                |
| IUACD#17C1322 | Bulk Peat   | PS3       | 25-34 cm    | 1413 $\pm$ 34                       | 1372 to 1285                              | 1320             |
| IUACD#17C1323 | Bulk Peat   | PS5       | 47-56 cm    | 3280 $\pm$ 41                       | 3608 to 3401                              | 3510             |
| IUACD#17C1324 | Bulk Peat   | PS8       | 81-90 cm    | 4202 $\pm$ 45                       | 4852 to 4584                              | 4730             |
| IUACD#17C1325 | Bulk Peat   | PS10      | 104-113 cm  | 6135 $\pm$ 50                       | 7165 to 6894                              | 7035             |
| IUACD#19C2461 | Bulk Peat   | PS11      | 115-124 cm  | 11508 $\pm$ 49                      | 13455 to 13263                            | 13355            |
| IUACD#17C1326 | Bulk Peat   | PS13      | 138-147 cm  | 18235 $\pm$ 97                      | 22361 to 21846                            | 22103            |

178

### 179 2.3. *Macrocharcoal counts*

180 From each of the 13 samples collected for analyses, 1 gm peat was kept in 10 ml 10% KOH  
181 solution overnight to deflocculate particles followed by NaOCl treatment to remove non-  
182 charred organic matter (Stevenson and Haberle 2005). Particles >125 µm size were collected  
183 for identification. Macrocharcoal particles are visually recognizable as opaque, angular and  
184 usually planar, black fragment and were counted using a stereomicroscope (LeicaS4E) at 10x  
185 magnification (Mooney and Tinner 2011). The extraction was performed thrice for each  
186 sample, and the mean ( $\pm 1$  SD) count calculated.

187

### 188 2.4. *Microcharcoal, pollen count and dung fungal spore analyses*

189 Microcharcoal and fungal spores were extracted from peat using standard methods for chemical  
190 processing of pollen (Faegri and Iversen, 1989). The procedure involves a series of acid  
191 treatments with HCl to remove carbonates, HF to remove silicate minerals and acetolysis (9:1  
192 mixture of acetic anhydride and H<sub>2</sub>SO<sub>4</sub>) to remove polysaccharides (Erdtman, 1960). The  
193 samples were mounted on glass slides with glycerine and frequencies of microcharcoal, pollen  
194 (minimum of 800 pollen grains) and fungal spores were quantified using a microscope  
195 (Olympus CX43). Total pollen counts were done with the help of reference slides at the French  
196 Institute of Pondicherry (Tissot, Chikhi, and Nayar 1994). Black, opaque angular fragments  
197 >10 µm were identified and counted as microcharcoal particles (Clark 1988). We selected 4  
198 common fungal taxa considered as coprophilous and semi-coprophilous, *Sporormiella spp.*,  
199 *Sordaria spp.*, *Delitschia spp.*, and *Trichodelitschia spp.* (Perrotti and van Asperen 2019;  
200 Baker, Bhagwat, and Willis 2013) which were identified and classified at the level of genus or  
201 species based on van Geel et al. (2011); Cugny, Mazier, and Galop (2010). The ratio of  
202 coprophilous fungal spore count to total pollen count was used to estimate fungal spore  
203 abundance.

204

### 205 2.5. *Lipid extraction, quantification, biomarker identification and interpretation*

206 Total lipids were extracted from 0.2 g of the lyophilized peat samples using 9:1 v/v mixture of  
207 dichloromethane and methanol, and recovery standard consisting of 10 mg/l *n*-Hexatriacontane  
208 d<sub>50</sub>. The extracts were separated into two functional groups based on charge and hydrophobicity  
209 by solid phase extraction (SPE), using 6 ml glass columns packed with 500 mg of Supelco  
210 Superclean LC-NH-2 (Kim and Salem 1990). The columns were eluted with hexane (15 ml,

211 Fraction 1: alkanes) CHCl<sub>3</sub>/isopropanol (15 ml of 2:1 v/v, Fraction 2: alkanols). The Fraction  
212 2 was dissolved in 100 µl bis(trimethylsilyl) trifluoroacetamide (BSTFA) and 100 µl of pyridine,  
213 and heated (70 °C for 120 min) to convert all the alkanols into their respective trimethylsilyl  
214 ethers.

215 The two different lipid fractions were quantified in an Agilent 6890N GC (Linköping  
216 University, Sweden) interfaced to an Agilent 5973 MSD mass spectrometer at 70 eV and  
217 scanned from m/z 40–600 (at 2.62 scans/s; following Ghosh, Routh, and Bhadury (2017)). All  
218 eluted solvents were evaporated, Fraction 1 was re-dissolved in hexane, while Fraction 2  
219 samples were re-dissolved in CHCl<sub>3</sub>: MeOH (2:1), prior to injection in splitless mode (1 µl;  
220 inlet pressure of 10 psi with a flow rate 54.3 ml/min) and separated on a HP-5 MS capillary  
221 column (5% diphenyl dimethyl polysiloxane; 30 m length, 0.25mm i.d. and 0.25 µm film  
222 thickness). All the samples were run at constant flow (1.3 ml/min) with He as carrier gas.  
223 Detection limit in the different standards ranged from 0.1 to 1 ng/g. Reproducibility of internal  
224 standards was in the range of 5-10 ppm for different compounds. All the lipid fractions were  
225 identified in samples by comparing their characteristic mass spectra, and generated ion  
226 fragments (base peak and molecular ion), retention time, and elution order published in the  
227 literature (Peters, Walters, and Moldowan 2005), NIST online library, and Archives of Mass  
228 Spectrometry.

229 We employed several *n*-alkane indices based on carbon chain length and ratios of different  
230 compounds to infer their origin from different plant types such as grasses, trees/shrubs, and  
231 aquatic plants. Similarly, stanols and sterols extracted from peat samples were used to infer  
232 their inputs from herbivorous mammal or human faeces (Table 2).

233

234 Table 2. Lipid biomarker ratios used in the present study and their interpretation (References: 1-  
235 Cranwell, 1973, 2- Rommerskirchen et al., 2006, 3-Gagosian and Peltzer, 1986, 4-Schwark et  
236 al 2002, 5- Ficken et al., 2000, 6-Nichols et al., 2006, 7-Andersson et al., 2011, 8-Zheng et al.,  
237 2007, 9-Jardé et al., 2007a, 10-Jardé et al., 2007b, 11- Derrien, Yang, and Hur 2017, 12-Grimalt  
238 et al., 1990)

239

240

241

242



|                        | <b>Lipid biomarker ratio</b>                                              | <b>Inference</b>                                                                                                                                                    | <b>Reference</b> |
|------------------------|---------------------------------------------------------------------------|---------------------------------------------------------------------------------------------------------------------------------------------------------------------|------------------|
| <i>n</i> -alkane index | $ACL = \frac{\sum_{n=25}^{31}(C_n * n)}{\sum_{n=25}^{31}(C_n)}$           | In warmer climates vascular land plants develop longer chain wax lipids than in cooler climates in order to avoid loss of water during transpiration                | 1,2,3            |
|                        | $\frac{C_{27}}{C_{31}}$                                                   | Elevated $C_{27}/C_{31}$ ratio indicates increased input from biomarkers related to tree-leaf origin while low $C_{27}/C_{31}$ indicate higher grass input.         | 4                |
|                        | $P_{aq} = \frac{C_{23} + C_{25}}{C_{23} + C_{25} + C_{27} + C_{29}}$      | Both ratios indicate the proportions of hydrocarbons from submerged and or floating aquatic macrophytes relative to the input from terrigenous and immersed plants. | 5,6              |
|                        | $\frac{C_{23}}{C_{27} + C_{31}}$                                          | Higher value is an indicator of moisture availability in the peatland which can be inferred as <b>increased precipitation</b> .                                     | 7,8              |
| Steroid Index          | $R1 = \frac{\text{Campesterol} + \text{Sitosterol}}{\text{Cholesterol}}$  | Higher proportion of sitosterol and campesterol indicates phytosterol-based diet, and <b>R1 &gt;2.5</b> is found in bovine faeces.                                  | 9,10,11          |
|                        | $R2 = \frac{\text{Coprostanol}}{\text{Cholestanol} + \text{Coprostanol}}$ | Coprostanol is a stanol found in higher proportion in human faeces and a ratio <b>R2 &gt;0.7</b> indicates human faecal presence in the sample                      | 12               |

243

244

### 245 **3. Results**

246

#### 247 *3.1 Chronology*

248 AMS radiocarbon dating of peat samples from 7 depths of the Sandynallah pit were found to  
 249 be in sequence without inversions; both radiocarbon and calibrated dates along with uncertainty  
 250 estimates are given in Table 1. The uppermost sample in the profile near the surface (PS1) is  
 251 modern in age, PS3 is dated to 1320 cal BP, and the deepest sample in the profile is dated to  
 252 22,103 cal BP. We see a faster accumulation rate in the Holocene and slower rate in Late  
 253 Pleistocene sections of the profile.

254

255

#### 256 *3.2 Charcoal abundance and fire occurrence*

257 Macrocharcoal counts from the peat samples of Sandynallah are high at ~22,000 cal BP  
 258 indicative of fires; the microcharcoal counts and charcoal/pollen ratios at this time are also  
 259 enhanced though to a lesser extent than the macrocharcoal counts. On the other hand,

260 macrocharcoal shows a sharp peak ~3,500 cal BP along with corresponding peaks in  
 261 microcharcoal counts and microcharcoal/pollen ratio (Fig. 2), clearly indicating intensive fire  
 262 in the region at this time.

263

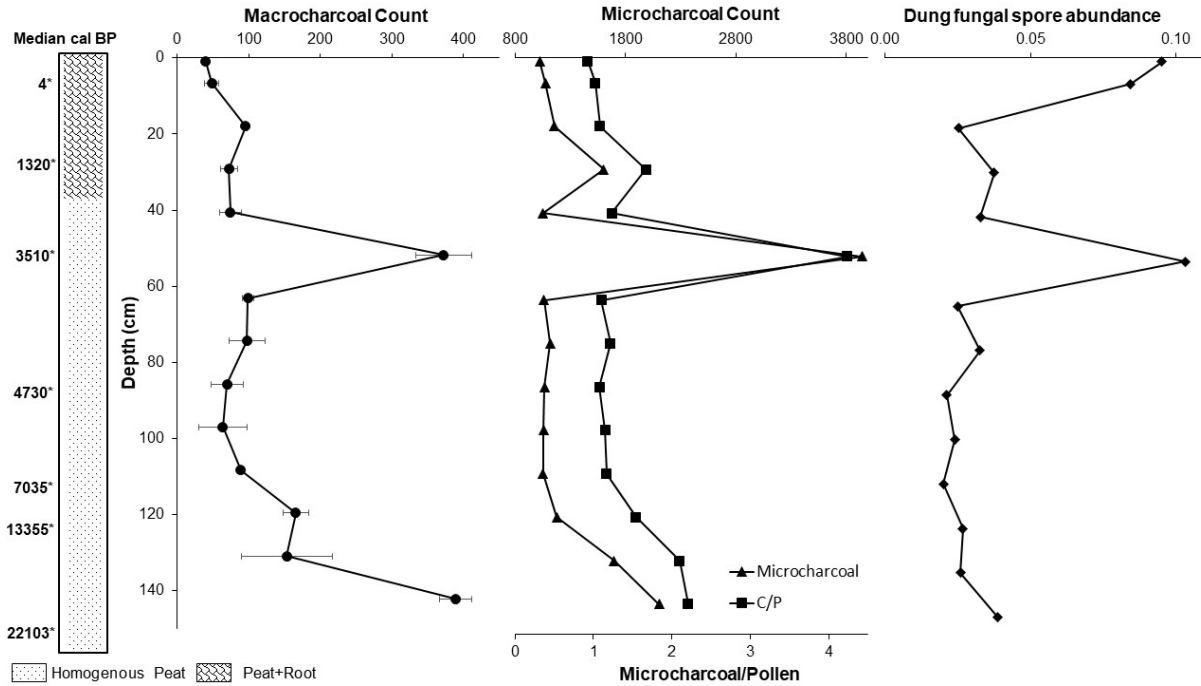

264

265 Fig 2. Macrocharcoal count, Microcharcoal count, Microcharcoal/Pollen ratio and the fungal  
 266 spore abundance plotted against depth for the 14 peat samples at Sandynallah.

267

### 268 3.3 Dung fungal spore abundance

269 Coprophilous fungal spores of the taxa *Sporormiella spp.*, *Sordaria spp.*, *Delitschia spp.*, and  
 270 *Trichodelitschia spp.* were found in the peat samples at different depths. The pollen-normalized  
 271 ratio of coprophilous fungal spore abundance showed two peaks, one in the modern samples  
 272 and another at ~3500 cal yr BP (Fig 2). Peaks in modern samples are consistent with the  
 273 increased presence of domestic livestock in the area, the peak at ~3500 cal yr BP coinciding  
 274 with the peak in micro- and macrocharcoal abundances, indicating a corresponding increase in  
 275 mammalian herbivore abundance around the time that intense fires were recorded.

276

### 277 3.4 Lipid biomarkers

278 The lipid biomarker proxies evaluated in the current study can be of three broad categories:  
 279 vegetation proxies (average chain length (ACL) and  $C_{27}/C_{31}$ , moisture proxies (Paq and  
 280  $C_{23}+C_{25}/C_{23}+C_{25}+C_{27}+C_{29}$ ) and steroid indices (R1 and R2) (Table 2). Total *n*-alkane content  
 281 of the samples ranged from 0.12 to 22.5  $\mu\text{g/g}$  of dry peat. Average chain length (ACL) in *n*-

282 alkanes varied between 28 to 31. ACL values peaked at 22,000 cal BP and shows an increasing  
283 from 4700 cal BP onward with a peak between 3500 and 1300 cal BP. The calculated  $P_{aq}$  ranged  
284 from 0.109 to 0.954 with the 3500 cal BP sample showing the lowest value  $P_{aq}$  value.  $nC_{27}/nC_{31}$   
285 ratio ranged from 0.13 to 5.57 in the peat samples with an average of 1.98 (Fig. 3). Changes in  
286  $nC_{23}/(nC_{27}+nC_{31})$  over time broadly correlated with the  $P_{aq}$  value, showing two peaks at ~4700  
287 and ~1300 cal BP. Two ratios of steroid compounds (see Table 2), one comprising sterols  
288 indicative of herbivore faecal presence and the other comprising stanols indicative of human  
289 faecal presence, from the peat samples are plotted in Figure 2. Peat sample dated at ~3500 cal  
290 yr BP showed the highest value for both ratios ( $R_1= 20.27$  and  $R_2= 0.98$ ) indicative of  
291 herbivore presence and human faecal presence. The sample at ~1300 cal yr BP also showed  
292 steroid ratios ( $R_1= 5.12$  and  $R_2= 0.94$ ) above threshold levels indicative of herbivore and  
293 human faeces. Modern samples also showed traces of herbivore faecal matter, though the  
294 steroid ratios were below the threshold of human faecal presence.

295

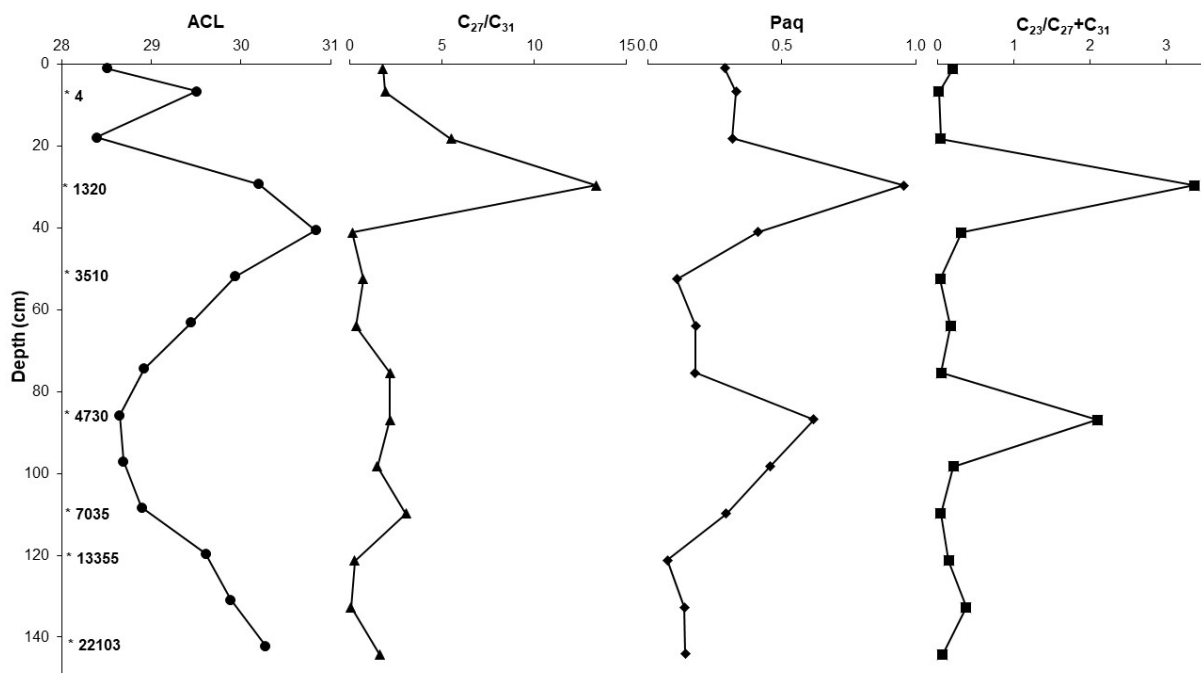

296

297 Fig 3. n-alkane biomarker indices, ACL and  $nC_{27}/nC_{31}$  indicating vegetation shifts in the past,  
298 and  $P_{aq}$ ,  $nC_{23}/(nC_{27}+nC_{31})$  indices showing the contribution from lower chain length  
299 alkanes indicating peatland wetness (see text and Table 2 for details).

300

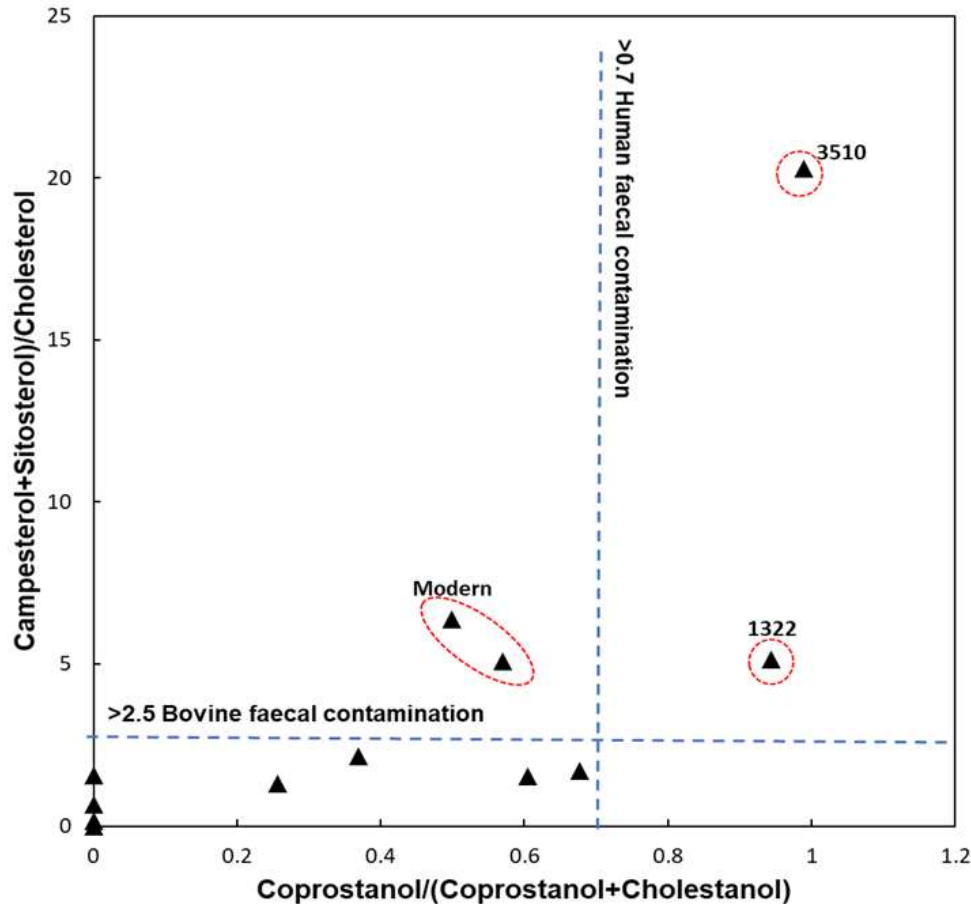

301

302 Fig 4. Plot of sterol biomarker ratio R1 versus R2 (see Table 2 for details), with human and  
303 bovine faecal contamination thresholds indicated by dotted lines. Biomarker ratios which are  
304 above the threshold values for bovine and human faeces are marked with a red circle along  
305 with their dates in cal BP.

306

#### 307 4. Discussion

308

309 We have shown through a combination of charcoal and pollen abundance, *n*-alkane  
310 concentration, coprophilous fungal spores and steroid lipid biomarkers in peat deposits  
311 (spanning the period ~ 22,000 cal. yr BP to the present) that intense fire activity at ~ 3500 cal.  
312 yr BP coincided with dominant grassland cover, abundance of herbivorous animals, and the  
313 presence of humans for the first time in a montane region (>2000m asl) of the Western Ghats,  
314 India. There are several questions which arise from these findings: were the fires in the  
315 extensive grasslands during this time the result of climatic desiccation or entirely due to  
316 deliberate human action?; does the abundance of herbivorous animals indicate populations of

317 wild mammals or domesticated mammals?; who were the people inhabiting the plateau at this  
318 time?

319

#### 320 *4.1 Fire history from the charcoal record*

321

322 The history of wildfire at a given location reflects both the prevailing climate as well as human  
323 activity and, hence, can provide valuable clues on human occupation of a site. Macrocharcoal  
324 (>125  $\mu\text{m}$ ) usually gets deposited close to the source of the fire making it a useful proxy for  
325 reconstructing fire history at a local scale, while microcharcoal (<125  $\mu\text{m}$ ) can have its origin  
326 over a much wider region, thus being a proxy for fire history over a broad spatial and temporal  
327 scale (Clark et al. 1998; Carcaillet et al. 2001; Whitlock and Larsen 2002).

328

329 Charcoal counts at Sandynallah depict two periods of enhanced fire activity, the first at ~  
330 22,000 cal yr BP and the second at ~3500 cal yr BP (Fig 2). The elevated levels of  
331 macrocharcoal in the sample from the deepest layer (142 cm) dated at ~22,000 cal yr BP are  
332 suggestive of burning of woody vegetation (shrubs and/or trees) (Fig 5). The sharply increased  
333 counts of microcharcoal and the high charcoal/pollen ratio clearly point to grassland fires  
334 during this period. This fire event is consistent with the expansion of C4 grasses and arid  
335 climatic conditions during the Last Glacial Maximum (LGM) recorded in paleovegetation and  
336 paleoclimate studies from the Nilgiri plateau (Sukumar et al. 1993; Caner et al. 2007). The Last  
337 Glacial Maximum dated variously across the globe at between 26-16 ka and characterized by  
338 lower temperatures and arid conditions worldwide (Clark et al. 2009; Hughes and Gibbard  
339 2015). The Indian summer (southwest) monsoon also weakened during the LGM (Prell and  
340 Kutzbach 1987; Kumaran et al. 2013; Saraswat, Nigam, and Correge 2014) including in the  
341 northern and central Western Ghats (Sukumar et al. 1993; Rajagopalan et al., 1997; Prabhu et  
342 al. 2004; Caner et al. 2007; Kumaran et al. 2013), and this would have increased the  
343 flammability of the vegetation including forest patches in the montane Nilgiris as seen in other  
344 tropical regions (Farrera et al. 1999; Bassinot et al. 1994; Prabhu et al. 2004; Caner et al. 2007).  
345 Greater fire activity during the Last Glacial Maximum (LGM) is also observed in charcoal  
346 records from tropical latitudes of Southeast Asia (Power et al. 2008).

347

348 The sharp increase in macrocharcoal counts, microcharcoal counts and C/P ratio in the peat  
349 layer from ~ 3500 cal yr BP is indicative of an intense, local fire event (Fig 2). Climate is the  
350 primary driver of wildfires globally (Flannigan et al. 2009; Krawchuk and Moritz 2011) and at

351 local scales such as the Nilgiris (Mondal and Sukumar 2016), with successful ignition and  
352 spread of fire from human activity (as opposed to natural causes such as lightning) generally  
353 playing a secondary role (Bowman et al. 2011) It is entirely possible that an immigrant  
354 pastoralist people set fire to the natural grasslands in order to improve the pasture for their  
355 livestock, a very common practise around the world since historical times (Johansen 2004;  
356 Vuorio et al. 2014; Coughlan 2015). Paleo-ecological studies, based on stable carbon isotope  
357 ratios discriminating between C4 plants (tropical grasses) and C3 plants (trees, shrubs and other  
358 herbs), at this site have clearly pointed to an overall weakening of the monsoon resulting in  
359 expansion of grassland during ~5000-2000 cal. yr BP (Sukumar et al. 1993; Rajagopalan et al.,  
360 1997). The environmental conditions at ~3500 yr BP would have been favourable for wildfires.  
361 However, the sharp spike in both micro- and macro-charcoal abundance in the present study  
362 indicates that not only grassland but also the embedded montane forest patches burnt, thereby  
363 implying that extremely dry weather and possibly high ambient temperatures provided the  
364 conditions for an intense fire/s to spread. There would have been no necessity for a pastoralist  
365 community to set fire to forest especially when grasslands were already extensive; it is thus  
366 most likely that natural fires or anthropogenic fires in the grasslands spread to the forest patches  
367 under extremely favourable weather conditions.

368  
369 Changes in pollen assemblages are used to interpret human agricultural practices, but  
370 palynological evidence from the Nilgiri region shows no indication of active cultivation in the  
371 higher elevation region except in recent times (Vasanthy 1988; Sutra, Bonnefille, and Fontugne  
372 1997). The intense fire event ~3500 cal yr BP in the upper Nilgiri plateau featuring dominant  
373 grassland vegetation is also coincident to the abrupt transition of forest to woodland/grassland  
374 further north in the Western Ghats (North Kanara district (0-700m asl) of Karnataka state, about  
375 500 km northwest from our montane site in the Nilgiris) at precisely the same time as evidenced  
376 in sharply enhanced counts of grass pollen and reduction of tree pollen in a marine core from  
377 the estuary of the Kalinadi River on the Arabian Sea coast (Caratini et al. 1991; Caratini et al.  
378 1994). This remarkable match in dates of the vegetation shift in North Kanara and the large  
379 fire event in the Upper Nilgiris provides unambiguous evidence of regional aridification at  
380 ~3500 cal yr BP in peninsular India.

381  
382 Increased forest clearing, landscape burning and agricultural activity after the mid-Holocene  
383 dry conditions played a crucial role in the determining the extent of vegetation cover in the  
384 mid- and lower elevations of the Western Ghats (Bhagwat et al. 2012). A study from mid-

385 elevation (c. 900 m asl) region of Kodagu District (Karnataka State), located 170 km to the  
386 north of the Nilgiris, recorded fire activity beginning around 3500 yr BP (though peaking at a  
387 later time), lowering the tree cover state, possibly due to large-scale land use changes for settled  
388 agriculture (Bhagwat et al., 2012).

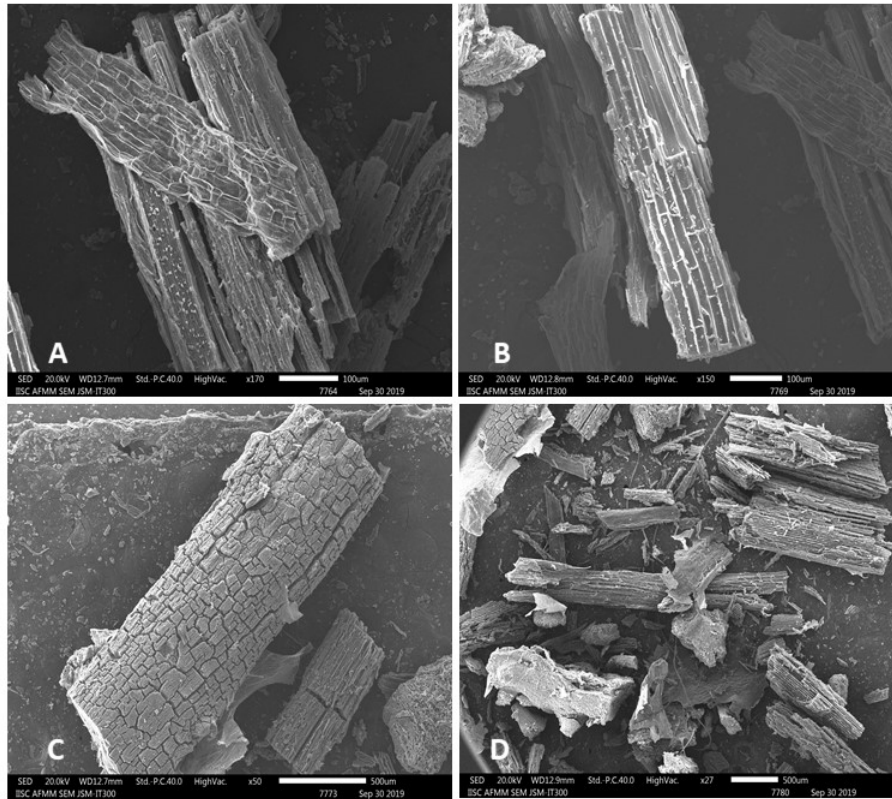

389  
390 Fig 5. Scanning electron microscope (SEM) images of macrocharcoal particles from two fire  
391 events recorded in pit profile; A and B are particles from the 3510 cal BP peat sample, while  
392 C and D are particles isolated from the 22103 cal BP peat sample

393

#### 394 *4.2 Lipid n-alkane biomarkers and vegetation change*

395

396 The main objective of the lipid *n*-alkane biomarker analysis was to look at the vegetation  
397 history of these natural montane forest-grassland mosaics and compare this to previous  
398 paleoecological studies from the region. Organic matter accumulated in the peat consists of  
399 above-ground plant material as well as secondary products from microbial alteration and  
400 diagenesis of the primary material. We used sedimentary *n*-alkane ratios as a proxy to  
401 understand the vegetation changes in general and, more specifically, the climate associated  
402 with the fire event dating back to ~3500 cal yr BP. *n*-alkane distributions are dominated by  
403 longer chain homologues, mainly *n*-C<sub>22-32</sub>, indicating higher input from epicuticular leaf waxes

404 of vascular plants and only minor contribution from algal and bacterial sources (Cranwell et  
405 al., 1987; Eglinton and Hamilton, 1967; Rieley et al., 1991; Rommerskirchen et al., 2006).  
406 Cranwell (1973) attributed elevated  $nC_{31}$  to grass input, whereas  $nC_{27}$  or  $nC_{29}$  predominance  
407 was related to a tree-leaf origin. Following this idea, we employed ACL and  $C_{27}/C_{31}$  as  
408 vegetation indices to elucidate the grassland-forest dynamics in the past. Since this is the first  
409 attempt to interpret vegetation abundance through  $n$ -alkanes at Sandynallah, we are aware of  
410 the limitations of not directly accounting for relative percentage contributions of biomass from  
411 grass and woody species. However, what is striking is that in both the major fire layers, i.e. at  
412  $\sim 22000$  cal BP and  $\sim 3500$  cal BP, higher ACL values and lower  $C_{27}/C_{31}$  point to a higher  
413 proportion of  $n$ - $C_{31}$  alkanes in the sediment, indicating a prevalence of grasslands (Cranwell,  
414 1973; Bi et al., 2005; Rommerskirchen et al., 2006). We also considered proxies of surface  
415 wetness in the peat bog since  $n$ -alkane distributions of submerged and floating plants maximize  
416 at  $C_{23}$  and  $C_{25}$  while land plants maximize at  $C_{27}$ ,  $C_{29}$  and  $C_{31}$  (Zheng et al. 2007). The moisture  
417 indices ( $P_{aq}$  ratio and  $nC_{23}/(nC_{27}+nC_{31})$ ) showed two peaks, one at  $\sim 4700$  cal BP and the other  
418 at  $\sim 1300$  cal BP, indicating wetter conditions; these indices however indicate very low surface  
419 wetness in the fire-impacted layers, consistent with the expectation of arid conditions during  
420 these periods (Fig 3). In past studies, the dominance of C4 plants (grasses and sedges) has been  
421 used as a proxy for dry and arid climatic conditions (Sukumar et al. 1993; Caner et al. 2007),  
422 consistent with our results of a grass-dominated, arid environment during the LGM, and the  
423 arid period at  $\sim 3500$  years BP supported by fluctuating monsoon conditions during mid-  
424 Holocene (Rajagopalan et al. 1997).

425

#### 426 *4.3 Coprophilous fungal spores and herbivore abundance*

427

428 Coprophilous fungal spores are used as a proxy for herbivore presence and abundance and to  
429 understand past pastoral activities (van Geel et al. 2011; Baker, Bhagwat, and Willis 2013;  
430 Dubois and Jacob 2016). Spores of coprophilous fungi such as *Coniochaeta*, *Sporormiella*,  
431 *Sordaria*, *Podospora*, *Delitschia* and *Trichodelitschia* are generally considered as reliable  
432 indicators of pastoralism (Cugny, Mazier, and Galop 2010; van Geel et al. 2011). The origin  
433 of the dung can be from livestock corralled at a site or from its use as manure, fuel and building  
434 materials (Linseele et al 2013). The spike in coprophilous fungal spores count at  $\sim 3500$  cal yr  
435 BP in the Nilgiri plateau indicates increased presence of herbivorous animals, which could be  
436 due to introduction of livestock by immigrant people (Fig 2). At the same time, the extensive  
437 grasslands at this time, possibly expanding over several hundred years (Rajagopalan et al.



438 1997), could also have facilitated an increase in the population of wild herbivores.  
439 Coprophilous fungal spores alone cannot distinguish between domestic and wild fauna  
440 (Giguët-Covex et al. 2014). One mammal species which could have benefitted from grassland  
441 expansion is the Nilgiri tahr (*Nilgiritragus hylocrius*), endemic to the higher elevation  
442 grasslands of the Western Ghats, but we cannot rule out the presence of other herbivorous  
443 mammals with more widespread distribution such as the gaur (*Bos gaurus*), a bovid, and the  
444 elephant (*Elephas maximus*), found in very low numbers presently at elevations >1500 m asl.  
445 However, a 5-fold spike in coprophilous fungal spores is unlikely to reflect an upsurge in wild  
446 herbivore populations but rather a corralled herd of domestic herbivores. Currently, sheep and  
447 other livestock are maintained at Sandynallah and this is accurately picked up in the increased  
448 coprophilous fungal spore abundance in the modern samples (Fig 2).

449

#### 450 *4.4 Lipid steroid biomarkers and human presence*

451

452 Faecal biomarkers are routinely used in archaeobotanical studies to understand anthropogenic  
453 inputs and to identify the origin of dung at a study site (Bull et al. 2001; Shillito et al. 2011;  
454 Bull et al. 2002; Bull et al. 1999). The relative ratio of two or more sterols and stanols can be  
455 used to discriminate the sources of faecal contamination (Derrien, Yang, and Hur 2017;  
456 Leeming et al. 1996). Herbivore faeces are expected to have higher proportion of sitosterol and  
457 campesterol due to their phytosterol-based diet, and the R1 >2.5 (see Table 2) is typical of  
458 faecal presence in a sample (Jardé et al. 2007a; Jardé et al. 2007b; Derrien, Yang, and Hur 2017).  
459 5 $\alpha$ -cholestanol is the diagenetic product of cholesterol indicative of source and preservation of  
460 stanol in the environment. We used R2 ratio (Table 1) to compare the 5 $\alpha$ -cholestanol with the  
461 coprostanol, which is a stanol found in higher proportion in human faeces to detect the presence  
462 of humans in the region (White et al. 2018; Bull et al. 2002). The 3500 cal yr. BP sample with  
463 higher R1 as well as R2 ratio indicate both human and herbivore faecal presence in the samples  
464 (Fig 4) (Derrien, Yang, and Hur 2017; Grimalt et al. 1990; Prost et al. 2017; Jardé et al. 2007a,  
465 Jardé et al. 2007b ). Modern samples showed traces of herbivore faecal contamination which  
466 is expected since the study site presently maintains stocks of sheep and is also visited by cattle  
467 (Fig 4). Interestingly, both R1 and R2 ratios are above the threshold levels in the 1300-year-  
468 old sample indicating the continued presence of livestock and humans.

469

470

471

472 *4.5 Who were the earliest inhabitants of the upper Nilgiri plateau?*

473

474 There are five traditional peoples or “tribes” in the Nilgiri hills – the Kurumbas, the Irulas, the  
475 Badagas, the Kotas and the Todas (Noble 1967).(Noble 1967) Of these, the Kurumbas and the  
476 Irulas inhabit the lower elevations (1600-600m asl) of the Nilgiris, practise subsistence  
477 agriculture or are hunter-gatherers and, thus, are unlikely to be the earliest inhabitants of the  
478 upper Nilgiri plateau. The Badagas are mainly cultivators inhabiting the upper plateau but are  
479 known to have migrated to the Nilgiris from the northern Karnataka region only during the late  
480 16th century CE following the defeat of the Vijayanagar Empire (Francis 1908; Hockings  
481 1980). The Kotas in the upper plateau are essentially artisans, musicians, and cultivators,  
482 though, like the Badagas, they may also tend some buffalo presently.

483

484

485 The most obvious candidates for the earliest inhabitants would be the Todas, a near-obligate  
486 pastoralist people believed to have inhabited the Nilgiri plateau around the 1st century CE and  
487 remained relatively isolated to the outside world until they were “discovered” during the early  
488 19th century by the erstwhile British administration (Rivers 1906; Emeneau 1997; Walker  
489 1997). Local legend also generally concedes that the Todas are the original inhabitants of the  
490 Nilgiri plateau. Based mainly on linguistic affinities of the Toda language with the common  
491 Dravidian languages of southern India, it has been suggested or even assumed that the Toda  
492 origin in the Nilgiris is not more than 2000 years old (Rivers 1906; Noble 1976; Emeneau  
493 1997; Zagarell 1997). Our study provides compelling evidence for the presence of people and  
494 livestock at Sandynallah in the higher elevations of the Nilgiris at 3500 cal BP coinciding with  
495 or subsequent to a changed climate and environment in peninsular India. This pastoralist people  
496 also probably managed the landscape through setting grassland fires whose spread was aided  
497 by favourable weather conditions. The most parsimonious interpretation would be that these  
498 people were indeed the Todas who had immigrated along with their buffaloes to this location  
499 by 3500 cal BP, or more than 1500 years prior to what has been believed so far. Genetic studies  
500 suggest that the Toda buffalo is most closely related to the buffaloes further north along the  
501 Western Ghats in the South Kanara district of Karnataka state (Kathiravan et al. 2011). It is of  
502 course entirely possible that the people and livestock recorded at 3500 cal BP represent an  
503 unknown tribe or even a failed immigration. In any case, the evidence opens up the  
504 interdisciplinary fields of paleoecology, archaeology, and human ecology during mid- to late

505 Holocene for further investigation not only in the montane Nilgiris but the broader region of  
506 peninsular India.

507

508

### 509 **Acknowledgments**

510 RS was a JC Bose National Fellow during the tenure of this study. DG thanks DST INSPIRE  
511 Faculty Funds (Grant No. DST/INSPIRE/04/2015/002362) for lipid biomarker analysis. SPK  
512 thanks Indian Institute of Science, Bangalore, and Inspire DST for the MS fellowship. We  
513 thank Dr. Anupama Krishnamurthy, Mr. Prasad S, and Mr. Orukaimani of French Institute,  
514 Puducherry who provided support and guidance in pollen slide preparation and valuable  
515 insights for the project. PRB thanks Prof. Iyue, Tamil Nadu Veterinary and Animal Sciences  
516 University (TANUVAS) and the staff at Sheep Breeding Research Station (SBRS),  
517 Sandynallah for permission and assistance with sample collection. Authors are thankful to  
518 IUAC for extending graphitization laboratory and AMS measurement facility for <sup>14</sup>C  
519 established under Ministry of Earth Science (MoES), Govt of India funded project with ref. no.  
520 MoES/16/07/11(i)-RDEAS.

521

522

523

524

525

526

527

528

529

530

531

532

## 533 **References**

534

- 535 1. Andersson, R.A., Kuhry, P., Meyers, P., Zebühr, Y., Crill, P., Mörtz, M., 2011. Impacts  
536 of paleohydrological changes on n-alkane biomarker compositions of a Holocene peat  
537 sequence in the eastern European Russian Arctic. *Organic Geochemistry* 42, 1065–  
538 1075. doi:10.1016/j.orggeochem.2011.06.020
- 539 2. Baker, A.G., Bhagwat, S.A., Willis, K.J., 2013. Do dung fungal spores make a good  
540 proxy for past distribution of large herbivores? *Quaternary Science Reviews* 62, 21–31.  
541 doi:10.1016/J.QUASCIREV.2012.11.018
- 542 3. Bhagwat, S.A., Nogué, S., Willis, K.J., 2012. Resilience of an ancient tropical forest  
543 landscape to 7500 years of environmental change. *Biological Conservation* 153, 108–  
544 117. doi:10.1016/J.BIOCON.2012.05.002
- 545 4. Bowman, D.M.J.S., Balch, J., Artaxo, P., Bond, W.J., Cochrane, M.A., D’Antonio,  
546 C.M., Defries, R., Johnston, F.H., Keeley, J.E., Krawchuk, M.A., Kull, C.A., Mack,  
547 M., Moritz, M.A., Pyne, S., Roos, C.I., Scott, A.C., Sodhi, N.S., Swetnam, T.W., 2011.  
548 The human dimension of fire regimes on Earth. *Journal of Biogeography*.  
549 doi:10.1111/j.1365-2699.2011.02595.x
- 550 5. Bull, I.D., Simpson, I.A., Bergen, P.F. van, Evershed, R.P., 1999. Muck ‘n’ molecules:  
551 organic geochemical methods for detecting ancient manuring. *Antiquity* 73, 86–96.  
552 doi:10.1017/S0003598X0008786X
- 553 6. Bull, I.D., Evershed, R.P., Betancourt, P.P., 2001. An organic geochemical  
554 investigation of the practice of manuring at a Minoan site on Pseira Island, Crete.  
555 *Geoarchaeology* 16, 223–242. doi:10.1002/1520-6548(200102)16:2<223::AID-  
556 GEA1002>3.0.CO;2-7
- 557 7. Bull, I.D., Lockheart, M.J., Elhmmali, M.M., Roberts, D.J., Evershed, R.P., 2002b. The  
558 origin of faeces by means of biomarker detection. *Environment International* 27, 647–  
559 654. doi:10.1016/S0160-4120(01)00124-6
- 560 8. Caner, L., Seen, D. Lo, Gunnell, Y., Ramesh, B.R., Bourgeon, G., 2007. Spatial  
561 heterogeneity of land cover response to climatic change in the Nilgiri highlands  
562 (Southern India) since the last glacial maximum. *The Holocene* 17, 195–205.  
563 doi:10.1177/0959683607075833
- 564 9. Caratini, C., Bentaleb, I., Fontugne, M., Morzadec-Kerfourn, M.T., Pascal, J.P., Tissot,  
565 C., 1994. A less humid climate since ca. 3500 yr B.P. from marine cores off Karwar,  
566 western India. *Palaeogeography, Palaeoclimatology, Palaeoecology* 109, 371–384.  
567 doi:10.1016/0031-0182(94)90186-4
- 568 10. Caratini, C., Fontugne, M., Pascal, J.P., Tissot, C., Bentaleb, I., 1991. A major change  
569 at ca. 3500 years BP in the vegetation of the Western Ghats in North Kanara, Karnataka.  
570 *Current science* 61, 669–672.
- 571 11. Carcaillet, C., Bouvier, M., Fréchet, B., Larouche, A.C., Richard, P.J.H., 2001.  
572 Comparison of pollen-slide and sieving methods in lacustrine charcoal analyses for  
573 local and regional fire history. *The Holocene* 11, 467–476.  
574 doi:10.1191/095968301678302904

- 575 12. Carto, S.L., Weaver, A.J., Hetherington, R., Lam, Y., Wiebe, E.C., 2009. Out of Africa  
576 and into an ice age: on the role of global climate change in the late Pleistocene migration  
577 of early modern humans out of Africa. *Journal of Human Evolution* 56, 139–151.  
578 doi:10.1016/j.jhevol.2008.09.004
- 579 13. Chandran, M.D.S., 1997. On the ecological history of the Western Ghats. *Current*  
580 *Science*. doi:10.2307/24098268
- 581 14. Clark, J.S., 1988. Particle motion and the theory of charcoal analysis: Source area,  
582 transport, deposition, and sampling. *Quaternary Research* 30, 67–80.  
583 doi:10.1016/0033-5894(88)90088-9
- 584 15. Clark, J.S., Lynch, J., Stocks, B.J., Goldammer, J.G., 1998. Relationships between  
585 charcoal particles in air and sediments in west-central Siberia. *Holocene* 8, 19–29.  
586 doi:10.1191/095968398672501165
- 587 16. Clark, P.U., Dyke, A.S., Shakun, J.D., Carlson, A.E., Clark, J., Wohlfarth, B.,  
588 Mitrovica, J.X., Hostetler, S.W., McCabe, A.M., 2009. The Last Glacial Maximum.  
589 *Science* 325, 710–714. doi:10.1126/science.1172873
- 590 17. Coughlan, M.R., 2015. Traditional fire-use, landscape transition, and the legacies of  
591 social theory past. *Ambio*. doi:10.1007/s13280-015-0643-y
- 592 18. Cranwell, P.A., 1973. Chain-length distribution of n-alkanes from lake sediments in  
593 relation to post-glacial environmental change. *Freshwater Biology* 3, 259–265.  
594 doi:10.1111/j.1365-2427.1973.tb00921.x
- 595 19. Cugny, C., Mazier, F., Galop, D., 2010. Modern and fossil non-pollen palynomorphs  
596 from the Basque mountains (western Pyrenees, France): the use of coprophilous fungi  
597 to reconstruct pastoral activity. *Vegetation History and Archaeobotany* 19, 391–408.  
598 doi:10.1007/s00334-010-0242-6
- 599 20. D'Andrea, W.J., Huang, Y., Fritz, S.C., Anderson, N.J., 2011. Abrupt Holocene climate  
600 change as an important factor for human migration in West Greenland. *Proceedings of*  
601 *the National Academy of Sciences of the United States of America* 108, 9765–9769.  
602 doi:10.1073/pnas.1101708108
- 603 21. Das, A., Nagendra, H., Anand, M., Bunyan, M., 2015. Topographic and Bioclimatic  
604 Determinants of the Occurrence of Forest and Grassland in Tropical Montane Forest-  
605 Grassland Mosaics of the Western Ghats, India. *PLOS ONE* 10, e0130566.  
606 doi:10.1371/journal.pone.0130566
- 607 22. Derrien, M., Yang, L., Hur, J., 2017. Lipid biomarkers and spectroscopic indices for  
608 identifying organic matter sources in aquatic environments: A review. *Water Research*  
609 112, 58–71. doi:10.1016/J.WATRES.2017.01.023
- 610 23. Dixit, Y., Hodell, D.A., Petrie, C.A., 2014. Abrupt weakening of the summer monsoon  
611 in northwest India ~4100 yr ago. *Geology* 42, 339–342. doi:10.1130/G35236.1
- 612 24. Dubois, N., Jacob, J., 2016. Molecular Biomarkers of Anthropic Impacts in Natural  
613 Archives: A Review. *Frontiers in Ecology and Evolution* 4, 92.  
614 doi:10.3389/fevo.2016.00092
- 615 25. Dutt, S., Gupta, A.K., Singh, M., Jaglan, S., Saravanan, P., Balachandiran, P., Singh,  
616 A., 2019. Climate variability and evolution of the Indus civilization. *Quaternary*  
617 *International* 507, 15–23. doi:10.1016/j.quaint.2018.11.012

- 618 26. Emeneau, M.B. 1997. Linguistics and botany in the Nilgiris. In: Blue Mountains  
619 Revisited, Cultural Studies on the Nilgiri Hills (ed. P. Hockings), pp.74-105. Oxford  
620 University Press, New Delhi.
- 621 27. Erdtman, G., 1960. The acetolysis method-a revised description. *Sven Bot Tidskr*, 54,  
622 pp.516-564.
- 623 28. Fang, J.Q., Liu, G., 1992. Relationship between climatic change and the nomadic  
624 southward migrations in eastern Asia during historical times. *Climatic Change* 22, 151–  
625 168. doi:10.1007/BF00142964
- 626 29. Farrera, I., Harrison, S.P., Prentice, I.C., Ramstein, G., Guiot, J., Bartlein, P.J.,  
627 Bonnefille, R., Bush, M., Cramer, W., Grafenstein, U. von, Holmgren, K.,  
628 Hooghiemstra, H., Hope, G., Jolly, D., Lauritzen, S.-E., Ono, Y., Pinot, S., Stute, M.,  
629 Yu, G., 1999. Tropical climates at the Last Glacial Maximum: a new synthesis of  
630 terrestrial palaeoclimate data. I. Vegetation, lake-levels and geochemistry. *Climate*  
631 *Dynamics* 15, 823–856. doi:10.1007/s003820050317
- 632 30. Faegri, K., Iversen, J., Kaland, P.E. and Krzywinski, K., 1989. Textbook of pollen  
633 analysis. Caldwell.
- 634 31. Francis, W. 1908. Madras District Gazetteers – The Nilgiris. Government Press,  
635 Madras.
- 636 32. Ficken, K., Li, B., Swain, D., Eglinton, G., 2000. An n-alkane proxy for the  
637 sedimentary input of submerged/floating freshwater aquatic macrophytes. *Organic*  
638 *Geochemistry* 31, 745–749. doi:10.1016/S0146-6380(00)00081-4
- 639 33. Flannigan, M.D., Krawchuk, M.A., Groot, W.J. De, Wotton, B.M., Gowman, L.M.,  
640 2009. Implications of changing climate for global wildland fire. *International Journal*  
641 *of Wildland Fire*. doi:10.1071/WF08187
- 642 34. Fuller, D.Q., 2013. 31 South Asia: archaeology. In: *The Encyclopedia of Global Human*  
643 *Migration*. Blackwell Publishing Ltd, Oxford, UK.  
644 doi:10.1002/9781444351071.wbeghm831
- 645 35. Fuller, D.Q., Boivin, N., Korisettar, R., 2007. Dating the Neolithic of South India: New  
646 radiometric evidence for key economic, social and ritual transformations. *Antiquity* 81,  
647 755–778. doi:10.1017/S0003598X00095715
- 648 36. Gagosian, R.B., Peltzer, E.T., 1986. The importance of atmospheric input of terrestrial  
649 organic material to deep sea sediments. *Organic Geochemistry* 10, 661–669.  
650 doi:10.1016/S0146-6380(86)80002-X
- 651 37. Geel, B. van, Gelorini, V., Lyaruu, A., Aptroot, A., Rucina, S., Marchant, R., Damsté,  
652 J.S.S., Verschuren, D., 2011. Diversity and ecology of tropical African fungal spores  
653 from a 25,000-year palaeoenvironmental record in southeastern Kenya. *Review of*  
654 *Palaeobotany and Palynology* 164, 174–190. doi:10.1016/J.REVPALBO.2011.01.002
- 655 38. Geel, B. Van, 2002. Non-Pollen Palynomorphs. Springer, Dordrecht, pp. 99–119.  
656 doi:10.1007/0-306-47668-1\_6
- 657 39. Ghosh, D., Routh, J., Bhadury, P., 2017. Sub-surface Biogeochemical Characteristics  
658 and Its Effect on Arsenic Cycling in the Holocene Gray Sand Aquifers of the Lower  
659 Bengal Basin. *Frontiers in Environmental Science* 5. doi:10.3389/fenvs.2017.00082
- 660 40. Giguet-Covex, C., Pansu, J., Arnaud, F., Rey, P.-J., Griggo, C., Gielly, L., Domaizon,  
661 I., Coissac, E., David, F., Choler, P., Poulénard, J., Taberlet, P., 2014. Long livestock

- 662 farming history and human landscape shaping revealed by lake sediment DNA. *Nature*  
663 *Communications* 5, 3211. doi:10.1038/ncomms4211
- 664 41. Grimalt, J.O., Fernandez, P., Bayona, J.M., Albaiges, J., 1990. Assessment of fecal  
665 sterols and ketones as indicators of urban sewage inputs to coastal waters.  
666 *Environmental Science & Technology* 24, 357–363. doi:10.1021/es00073a011
- 667 42. Hockings, P. 1980. *Ancient Hindu Refugees: Badaga Social History 1150-1975*.  
668 Mouton Publishers, The Hague
- 669 43. Hughes, P.D., Gibbard, P.L., 2015. A stratigraphical basis for the Last Glacial  
670 Maximum (LGM). *Quaternary International* 383, 174–185.  
671 doi:10.1016/j.quaint.2014.06.006
- 672 44. Jardé, E., Gruau, G., Mansuy-Huault, L., 2007a. Detection of manure-derived organic  
673 compounds in rivers draining agricultural areas of intensive manure spreading. *Applied*  
674 *Geochemistry* 22, 1814–1824. doi:10.1016/j.apgeochem.2007.03.037
- 675 45. Jardé, E., Gruau, G., Mansuy-Huault, L., Peu, P., Martinez, J., 2007b. Using Sterols to  
676 Detect Pig Slurry Contribution to Soil Organic Matter. *Water, Air, and Soil Pollution*  
677 178, 169–178. doi:10.1007/s11270-006-9188-9
- 678 46. Johansen, P.G., 2004. Landscape, monumental architecture, and ritual: A  
679 reconsideration of the South Indian ashmounds. *Journal of Anthropological*  
680 *Archaeology* 23, 309–330. doi:10.1016/j.jaa.2004.05.003
- 681 47. Jose, S., Sreepathy, A., Mohan Kumar, B., Venugopal, V.K., 1994. Structural, floristic  
682 and edaphic attributes of the grassland-shola forests of Eravikulam in peninsular India.  
683 *Forest Ecology and Management* 65, 279–291. doi:10.1016/0378-1127(94)90176-7
- 684 48. Kathiravan, P., Kataria, R.S., Mishra, B.P., Dubey, P.K., Sadana, D.K., Joshi, B.K.,  
685 2011. Population structure and phylogeography of Toda buffalo in Nilgiris throw light  
686 on possible origin of aboriginal Toda tribe of South India. *Journal of Animal Breeding*  
687 *and Genetics* 128, 295–304. doi:10.1111/j.1439-0388.2011.00921.x
- 688 49. Korisettar, R., Venkatasubbaiah, P. C., & Fuller, D. Q., 2001. Brahmagiri and beyond:  
689 The archaeology of the southern Neolithic. In R. Korisettar & S. Settar (Eds.), *Indian*  
690 *archaeology in retrospect. Prehistory, vol. I*. New Delhi: Manohar.
- 691 50. Korisettar, R., 2016. Out of Africa and into South Asia: The Evidence from Paleolithic  
692 Archaeology. In: *A Companion to South Asia in the Past*. Wiley, (ed. Gwen Robbins  
693 Schug and Subhash R. Walimbe). pp. 60–71. doi:10.1002/9781119055280.ch5
- 694 51. Krawchuk, M.A., Moritz, M.A., 2011. Constraints on global fire activity vary across a  
695 resource gradient. *Ecology* 92, 121–132. doi:10.1890/09-1843.1
- 696 52. Kumaran, K.P.N., Limaye, R.B., Puneekar, S.A., Rajaguru, S.N., Joshi, S. V., Karlekar,  
697 S.N., 2013. Vegetation response to South Asian Monsoon variations in Konkan,  
698 western India during the Late Quaternary: Evidence from fluvio-lacustrine archives.  
699 *Quaternary International* 286, 3–18. doi:10.1016/j.quaint.2012.03.010
- 700 53. Leeming, R., Ball, A., Ashbolt, N., Nichols, P., 1996. Using faecal sterols from humans  
701 and animals to distinguish faecal pollution in receiving waters. *Water Research* 30,  
702 2893–2900. doi:10.1016/S0043-1354(96)00011-5
- 703 54. von Lengerke H. J., 1977. *Nilgiris Weather and Climate of a Mountain Area in South*  
704 *India*. Franz Steiner Verlag, Wiesbaden, Germany.

- 705 55. Linseele, V., Riemer, H., Baeten, J., Vos, D. De, Marinova, E., Ottoni, C., 2013. Species  
706 identification of archaeological dung remains: A critical review of potential methods.  
707 Environmental Archaeology 18, 5–17. doi:10.1179/1461410313Z.00000000019
- 708 56. Meher-Homji, V.M., 1967. Phytogeography of the South Indian Hill Stations. Bulletin  
709 of the Torrey Botanical Club 94, 230. doi:10.2307/2483901
- 710 57. Meyers, P.A., 2003. Applications of organic geochemistry to paleolimnological  
711 reconstructions: a summary of examples from the Laurentian Great Lakes. Organic  
712 Geochemistry 34, 261–289. doi:10.1016/S0146-6380(02)00168-7
- 713 58. Mondal, N., Sukumar, R., 2016. Fires in Seasonally Dry Tropical Forest: Testing the  
714 Varying Constraints Hypothesis across a Regional Rainfall Gradient. PLOS ONE 11,  
715 e0159691. doi:10.1371/journal.pone.0159691
- 716 59. Morrison, K.D., Sinopoli, C.M., Wilcox Black, K., Trivedi, M., Bauer, A., Lycett, M.,  
717 Haricharan, S., Bates, J. and Reddy, S. From the Southern Neolithic to the Iron Age: a  
718 View from Kadabakele. In press, *Beyond Stones and More Stones*, volume 3, edited by  
719 Ravi Korisettar, Bangalore: Mythic Society.
- 720 60. Nakamura, T., Oda, T., Tanaka, A. and Horiuchi, K., 2003. High precision <sup>14</sup>C age  
721 estimation of bottom sediments of Lake Baikal and Lake Hovsgol by AMS. In Gekkan  
722 Chikyu (Vol. 42, pp. 20-31), Tokyo: Kaiyoushuppan.
- 723 61. Nash, D., Leeming, R., Clemow, L., Hannah, M., Halliwell, D., Allen, D., 2005.  
724 Quantitative determination of sterols and other alcohols in overland flow from grazing  
725 land and possible source materials. Water Research 39, 2964–2978.  
726 doi:10.1016/J.WATRES.2005.04.063
- 727 62. Nichols, J.E., Booth, R.K., Jackson, S.T., Pendall, E.G., Huang, Y., 2006.  
728 Paleohydrologic reconstruction based on n-alkane distributions in ombrotrophic peat.  
729 Organic Geochemistry 37, 1505–1513. doi:10.1016/J.ORGGEOCHEM.2006.06.020
- 730 63. Noble, W. 1976, Nilgiri Dolmens (South India). Anthropos 71:90-128.
- 731 64. Pancost, R.D., Baas, M., Geel, B. van, Sinninghe Damsté, J.S., 2002. Biomarkers as  
732 proxies for plant inputs to peats: an example from a sub-boreal ombrotrophic bog.  
733 Organic Geochemistry 33, 675–690. doi:10.1016/S0146-6380(02)00048-7
- 734 65. Pei, Q., 2017. Migration for survival under natural disasters: A reluctant and passive  
735 choice for agriculturalists in historical China. Science China Earth Sciences 60, 2089–  
736 2096. doi:10.1007/s11430-017-9080-6
- 737 66. Perrotti, A.G., Asperen, E. van, 2019. Dung fungi as a proxy for megaherbivores:  
738 opportunities and limitations for archaeological applications. Vegetation History and  
739 Archaeobotany 28, 93–104. doi:10.1007/s00334-018-0686-7
- 740 67. Peters, K.E. and Moldowan, J.M., 1993. The Biomarker Guide: Interpreting Molecular  
741 Fossils in Petroleum and Ancient Sediments. Prentice-Hall, Englewood Cliffs, NJ
- 742 68. Power, M.J., Marlon, J., Ortiz, N., Bartlein, P.J., Harrison, S.P., Mayle, F.E., Ballouche,  
743 A., Bradshaw, R.H.W., Carcaillet, C., Cordova, C., Mooney, S., Moreno, P.I., Prentice,  
744 I.C., Thonicke, K., Tinner, W., Whitlock, C., Zhang, Y., Zhao, Y., Ali, A.A., Anderson,  
745 R.S., Beer, R., Behling, H., Briles, C., Brown, K.J., Brunelle, A., Bush, M., Camill, P.,  
746 Chu, G.Q., Clark, J., Colombaroli, D., Connor, S., Daniau, A.-L., Daniels, M., Dodson,  
747 J., Doughty, E., Edwards, M.E., Finsinger, W., Foster, D., Frechette, J., Gaillard, M.-  
748 J., Gavin, D.G., Gobet, E., Haberle, S., Hallett, D.J., Higuera, P., Hope, G., Horn, S.,



- 749 Inoue, J., Kaltenrieder, P., Kennedy, L., Kong, Z.C., Larsen, C., Long, C.J., Lynch, J.,  
750 Lynch, E.A., McGlone, M., Meeks, S., Mensing, S., Meyer, G., Minckley, T., Mohr, J.,  
751 Nelson, D.M., New, J., Newnham, R., Noti, R., Oswald, W., Pierce, J., Richard, P.J.H.,  
752 Rowe, C., Sanchez Goñi, M.F., Shuman, B.N., Takahara, H., Toney, J., Turney, C.,  
753 Urrego-Sanchez, D.H., Umbanhowar, C., Vandergoes, M., Vanniere, B., Vescovi, E.,  
754 Walsh, M., Wang, X., Williams, N., Wilmshurst, J., Zhang, J.H., 2008. Changes in fire  
755 regimes since the Last Glacial Maximum: an assessment based on a global synthesis  
756 and analysis of charcoal data. *Climate Dynamics* 30, 887–907. doi:10.1007/s00382-  
757 007-0334-x
- 758 69. Prabhu, C.N., Shankar, R., Anupama, K., Taieb, M., Bonnefille, R., Vidal, L., Prasad,  
759 S., 2004. A 200-ka pollen and oxygen-isotopic record from two sediment cores from  
760 the eastern Arabian Sea. *Palaeogeography, Palaeoclimatology, Palaeoecology* 214,  
761 309–321. doi:10.1016/J.PALAEO.2004.07.027
- 762 70. Prell, W.L., Kutzbach, J.E., 1987. Monsoon variability over the past 150 000 years.  
763 *Journal of Geophysical Research* 92, 8411–8425. doi:10.1029/JD092iD07p08411
- 764 71. Prost, K., Birk, J.J., Lehndorff, E., Gerlach, R., Amelung, W., 2017. Steroid Biomarkers  
765 Revisited – Improved Source Identification of Faecal Remains in Archaeological Soil  
766 Material. *PLOS ONE* 12, e0164882. doi:10.1371/journal.pone.0164882
- 767 72. Rajagopalan, G., Sukumar, R., Ramesh, R., Pant, R.K., Rajagopalan, G., 1997. Late  
768 Quaternary vegetational and climatic changes from tropical peats in southern India –  
769 An extended record up to 40,000 years BP. *Current Science*. doi:10.2307/24098146
- 770 73. Ramsey, C.B., 2013. Recent and Planned Developments of the Program OxCal.  
771 *Radiocarbon* 55. 720-730. doi:10.2458/azu\_js\_rc.55.16215
- 772 74. Ramya Bala, P. Evaluating geochemical proxies for paleoclimate reconstruction in  
773 tropical montane peat: a case study from the Nilgiris, southern India. (Indian Institute  
774 of Science, 2015). doi:10.13140/RG.2.2.31409.40807
- 775 75. Ramya Bala, P., Nakamura, T., Sajeev, K., Sukumar, R., 2016. High-resolution age-  
776 depth chronology from tropical montane minerotrophic peat in the Sandynallah valley,  
777 Western Ghats, southern India: Analytical issues and implications. *Quaternary*  
778 *Geochronology* 34, 12–23. doi:10.1016/J.QUAGEO.2016.03.003
- 779 76. Rivers, W.H.R., 1906. *The Todas*. Macmillan and Company, London.
- 780 77. Rommerskirchen, F., Plader, A., Eglinton, G., Chikaraishi, Y., Rullkötter, J., 2006.  
781 Chemotaxonomic significance of distribution and stable carbon isotopic composition  
782 of long-chain alkanes and alkan-1-ols in C4 grass waxes. *Organic Geochemistry* 37,  
783 1303–1332. doi:10.1016/J.ORGGEOCHEM.2005.12.013
- 784 78. Saraswat, R., Nigam, R., Correge, T., 2014. A glimpse of the Quaternary monsoon  
785 history from India and adjoining seas. *Palaeogeography, Palaeoclimatology,*  
786 *Palaeoecology*. doi:10.1016/j.palaeo.2013.11.001
- 787 79. Schroeter, N., Lauterbach, S., Stebich, M., Kalanke, J., Mingram, J., Yildiz, C.,  
788 Schouten, S., Gleixner, G., 2020. Biomolecular Evidence of Early Human Occupation  
789 of a High-Altitude Site in Western Central Asia During the Holocene. *Frontiers in Earth*  
790 *Science* 8, 20. doi:10.3389/feart.2020.00020
- 791 80. Schwark, L., Zink, K., Lechterbeck, J., 2002. Reconstruction of postglacial to early  
792 Holocene vegetation history in terrestrial Central Europe via cuticular lipid biomarkers

- 793 and pollen records from lake sediments. *Geology* 30, 463. doi:10.1130/0091-  
794 7613(2002)030<0463:ROPTEH>2.0.CO;2
- 795 81. Sharma, R., Umapathy, G.R., Kumar, P., Ojha, S., Gargari, S., Joshi, R., Chopra, S.,  
796 Kanjilal, D., 2019. AMS and upcoming geochronology facility at Inter University  
797 Accelerator Centre (IUAC), New Delhi, India. *Nuclear Instruments and Methods in*  
798 *Physics Research, Section B: Beam Interactions with Materials and Atoms* 438, 124–  
799 130. doi:10.1016/j.nimb.2018.07.002
- 800 82. Shillito, L.M., Bull, I.D., Matthews, W., Almond, M.J., Williams, J.M., Evershed, R.P.,  
801 2011. Biomolecular and micromorphological analysis of suspected faecal deposits at  
802 Neolithic Çatalhöyük, Turkey. *Journal of Archaeological Science* 38, 1869–1877.  
803 doi:10.1016/j.jas.2011.03.031
- 804 83. Stevenson, J., Haberle, S., 2005. Macro Charcoal Analysis: A modified technique used  
805 by the Department of Archaeology and Natural History, Australian National University,  
806 Canberra (2005). <http://palaeoworks.anu.edu.au/paltr05.pdf>.
- 807 84. Sukumar, R., Ramesh, R., Pant, R.K., Rajagopalan, G., 1993. A  $\delta^{13}\text{C}$  record of late  
808 Quaternary climate change from tropical peats in southern India. *Nature* 364, 703–706.  
809 doi:10.1038/364703a0
- 810 85. Sutra, J.-P., Bonnefille, R., Fontugne, M., 1997. Étude palynologique d'un nouveau  
811 sondage dans les marais de Sandynallah (massif des Nilgiri, Sud-Ouest de l'Inde.  
812 *Géographie physique et Quaternaire* 51, 415. doi:10.7202/033140ar
- 813 86. Tierney, J.E., deMenocal, P.B., Zander, P.D., 2017. A climatic context for the out-of-  
814 Africa migration. *Geology* 45, 1023–1026. doi:10.1130/G39457.1
- 815 87. Tissot, C., Chikhi, H., Nayar, T.S., 1994. Pollen of wet evergreen forests of the Western  
816 Ghats, India. Institut Français de Pondichéry, 133 p., Publications du département  
817 d'écologie, no. 35, Institut Français de Pondichéry.
- 818 88. Vasanthy, G., 1988. Pollen analysis of late Quaternary sediments: Evolution of upland  
819 savanna in Sandynallah (Nilgiris, South India). *Review of Palaeobotany and*  
820 *Palynology* 55, 175–192. doi:10.1016/0034-6667(88)90084-X
- 821 89. Vuorio, V., Muchiru, A., S. Reid, R., Ogutu, J.O., 2014. How pastoralism changes  
822 savanna vegetation impact of old pastoral settlements on plant diversity and abundance  
823 in south western Kenya. *Biodiversity and Conservation* 23, 3219–3240.  
824 doi:10.1007/s10531-014-0777-4
- 825 90. White, A.J., Stevens, L.R., Lorenzi, V., Munoz, S.E., Lipo, C.P., Schroeder, S., 2018.  
826 An evaluation of fecal stanols as indicators of population change at Cahokia, Illinois.  
827 *Journal of Archaeological Science* 93, 129–134. doi:10.1016/j.jas.2018.03.009
- 828 91. Whitlock, C., Larsen, C., 2002. Charcoal as a Fire Proxy. In: *Tracking Environmental*  
829 *Change Using Lake Sediments*. Kluwer Academic Publishers, Dordrecht, pp. 75–97.  
830 doi:10.1007/0-306-47668-1\_5
- 831 92. Zagarell, A., 1997. The megalithic graves of the Nilgiri Hills and the Moyar ditch. In:  
832 *Blue Mountains Revisited: Cultural Studies on the Nilgiri Hills*. Paul Hockings, ed,  
833 pp.23-73. Oxford University Press, New Delhi.
- 834 93. Zheng, Y., Zhou, W., Meyers, P.A., Xie, S., 2007. Lipid biomarkers in the Zoigê-  
835 Hongyuan peat deposit: Indicators of Holocene climate changes in West China.  
836 *Organic Geochemistry* 38, 1927–1940. doi:10.1016/J.ORGGEOCHEM.2007.06.012

837

838

839

840

841
